1 **The contrasted impacts of grasshoppers on soil**  
2 **microbial activities in function of ecosystem**  
3 **productivity and herbivore diet**

4  
5 Sébastien Ibanez<sup>1</sup>, Arnaud Foulquier<sup>1</sup>, Charles Brun<sup>1,2</sup>, Marie-Pascale Colace<sup>1</sup>, Gabin Piton<sup>1</sup>, Lionel  
6 Bernard<sup>1</sup>, Christiane Gallet<sup>1</sup>, Jean-Christophe Clément<sup>1,3</sup>

7  
8 1 Univ. Grenoble Alpes, Univ. Savoie Mont Blanc, CNRS UMR 5553, LECA, Chambéry, France

9  
10 2 University of Applied Sciences and Arts Western Switzerland – Land, Nature, Environment  
11 Institute, Hepia Geneva, Route de Presinge 150, CH-1254, Jussy, Switzerland

12  
13 3 Univ. Savoie Mont Blanc, INRAE, CARRTEL, Thonon-Les-Bains, France

14  
15 Key words: nutrient cycling, primary productivity, grasshoppers, grasslands, ecosystem functioning,  
16 plant- soil feedbacks.

17  
18  
19  
20

## 21 Abstract

22 Herbivory can have contrasted impacts on soil microbes and nutrient cycling, which has stimulated  
23 the development of conceptual frameworks exploring the links between below- and aboveground  
24 processes. The “productivity model” predicts that herbivores stimulate microbial activities and  
25 accelerate nutrient mineralization in productive ecosystems, while they have an opposite effect in  
26 less productive ecosystems. In parallel, the “diet model” predicts that herbivores feeding on  
27 conservative plants accelerate nutrient cycling while those feeding on exploitative plants decelerate  
28 nutrient cycling, due to changes in litter inputs. Since these two frameworks can lead to conflicting  
29 predictions in some cases, experimental evidence combining herbivore diet and productivity is  
30 required.

31 During two consecutive years, we conducted an experiment controlling the presence of three  
32 grasshopper species consuming either grasses, forbs or both in twelve natural and managed alpine  
33 grasslands of contrasted productivities. In order to assess the effects of herbivory on soil microbes,  
34 we measured their enzymatic activities, their biomass and the soil potential nitrogen mineralization  
35 (PNM). Soil and vegetation characteristics were also determined in order to test if they modulated the  
36 effects of herbivory on microbes.

37 Contrary to the predictions of the diet model, the effects of herbivory on microbial characteristics did  
38 not depend on the herbivores diet but relied on ecosystem productivity. The most productive sites  
39 were characterized by exploitative plant species which depleted N resources in the soil, and by  
40 microbes producing relatively few extracellular enzymes, leading to a lower PNM. Herbivory  
41 increased microbial biomass and decreased the production of extracellular enzymes in those sites,  
42 possibly through the stimulation of root exudates produced by exploitative species. The least  
43 productive sites were characterized by conservative plants, which led to the sequestration of soil C,  
44 and by microbes having a resource acquisition strategy (more extracellular enzymes, higher PNM).  
45 Herbivory decreased microbial biomass and increased the production of extracellular enzymes in  
46 those sites. This pattern can be explained by the loss of carbon associated with insect respiration,  
47 which increases the need for microbes to acquire resources and by a lower production of root  
48 exudates by conservative species. Therefore, the effects of two years of herbivory on soil microbes  
49 were at odds with the productivity model, which focuses instead on longer term effects corresponding  
50 to herbivory-induced changes in plant species composition. This highlights the multidimensional  
51 feature of the impacts of herbivory on ecosystem functioning, both in space and time.

52

53

54

55

56

## 57 Introduction

58 During the last decades the influence of herbivory on terrestrial ecosystem functioning has been  
59 highlighted through its effects on matter and energy fluxes linking above and belowground  
60 communities (Parker et al. 2017; Kristensen et al. 2020; Sandén et al. 2020). Plant-herbivore  
61 interactions influence the quantity and quality of organic matter inputs to soil detrital food webs with  
62 important implications on the rate of microbial processes which regulate organic matter  
63 decomposition and nutrient recycling and ultimately control the maintenance of soil fertility and  
64 carbon sequestration (Bardgett and Wardle 2010). Previous studies have already reported a diversity  
65 of impacts of herbivory (Hunter 2001; Bakker et al. 2004), including positive (e.g. Frank et al. 2000;  
66 Belovsky and Slade 2000), negative (e.g. Ritchie et al. 1998) or no detectable effects (Singer and  
67 Schoenecker 2003) on soil carbon and nutrient cycling. An overarching conceptual model of these  
68 contrasting effects is needed in order to understand which ecological variables control the direction  
69 and magnitude of the effects of herbivory on soil microbial communities and related ecosystem  
70 processes.

71  
72 Among the different frameworks that have been proposed, one focuses on the contrasting effects of  
73 ecosystem productivity (Bardgett and Wardle 2003, 2010; Wardle et al. 2004), and one on the  
74 mitigation by herbivore diet (Ritchie et al. 1998; Belovsky and Slade 2000; Hunter 2001). The  
75 “productivity model” predicts that in productive ecosystems herbivores consume a high percentage of  
76 the net primary production (NPP), rapidly returning organic matter to the soil as easily decomposable  
77 fecal material enriched in nutrients (“fast cycle”, McNaughton et al. 1988). Herbivores also promote  
78 compensatory plant growth (McNaughton 1983) or nutrient reallocation in leaf tissues of exploitative  
79 plant species (Potthast et al. 2021), while they slow down the establishment of conservative plant  
80 species which produce more recalcitrant litter (Reich 2014). The combination of these positive effects  
81 on the quality of detrital resources leads to an acceleration of nutrient cycling, which further induces  
82 a positive feedback loop. Instead, in infertile ecosystems herbivores consume a smaller proportion of  
83 the NPP, favoring the accumulation of recalcitrant plant litter (“slow cycle”, McNaughton et al. 1988).  
84 This comes along with the promotion of conservative plant species producing even more recalcitrant  
85 litter therefore a slower nutrient cycling.

86  
87 In contrast, the “diet model” focuses on a different axis of variation of herbivore-plant-soil interactions  
88 and distinguishes two types of herbivores, those consuming exploitative plants (fast-growing with  
89 high leaf nutrient content), and those eating conservative plants. Indeed, although most vertebrate  
90 herbivores either feed non-selectively or prefer high-quality plants (Hofmann 1989; Clauss et al.  
91 2003), many insects prefer tougher plants (Ibanez et al. 2013) and perform better on seemingly low-  
92 quality diets (Cease et al. 2012; Talal et al. 2020). Herbivores feeding on exploitative plants favor the  
93 growth and survival of conservative plants and therefore the accumulation of more recalcitrant litter.  
94 This slows down organic matter cycling, as predicted by the productivity model according to which  
95 herbivores preferentially feed on higher quality plants in the least productive ecosystems (Bardgett  
96 and Wardle 2010). Instead, herbivores feeding on conservative plants transfer low quality litter into  
97 the fast cycle, which accelerates decomposition and nutrient cycling, and promotes exploitative plant  
98 species (Belovsky and Slade 2000). A comparable framework was also proposed by Tuomi et al  
99 (2019) in the particular context of burrow-dwelling rodents. These herbivores feed on exploitative

100 plants thereby reducing soil N availability; but they can also physically damage unpalatable  
101 conservative plants by their burrowing activities, which has opposite effects. At high densities the  
102 latter process becomes preponderant, these rodents can therefore accelerate nutrient cycling despite  
103 a diet dominated by the more palatable exploitative plants.

104  
105 During the last 20 years, several experiments controlling for herbivory either by ungulates or insects  
106 provided evidence in favor of the diet model. When herbivores fed on the most conservative plants,  
107 they increased primary production and/or nutrient availability (McNaughton et al. 1997; Belovsky and  
108 Slade 2000, 2018; Garibaldi et al. 2007; Schmitz 2008; Nitschke et al. 2014). In contrast, when  
109 herbivores fed on the most exploitative plants they had an opposite effect (Pastor et al. 1993; Ritchie  
110 et al. 1998; van Wijnen et al. 1999; Harrison and Bardgett 2004; Schmitz 2008; Belovsky and Slade  
111 2018). The two experiments showing such combination of both effects used polyphagous  
112 grasshopper species (*Melanoplus femurrubrum* and *M. sanguinipes*), for which the diet changes  
113 either according to the type of predators present (Schmitz 2008) or depending on intraspecific  
114 variation of leaf water content (Belovsky and Slade 2018). However, these experiments as well as  
115 others (e.g. Deraison et al. 2015) manipulated either the presence or the diets of herbivores in a  
116 single type of ecosystem, which hampers the articulation of the diet model with the productivity  
117 model.

118  
119 Furthermore, while the productivity and diet models explicitly consider plant and herbivore resource  
120 acquisition strategies, they do not consider the resource acquisition traits of soil microbes. Yet,  
121 microbial communities are key regulators of nutrient recycling in the plant-soil system, and recent  
122 developments suggest that including microbial communities in a multitrophic functional trait  
123 framework could strengthen our mechanistic understanding of ecosystem functioning (Malik et al.  
124 2020; Piton et al. 2020b). Resource acquisition strategies of microbial communities can be partly  
125 inferred from the characterization of enzymatic activities involved in C, N and P acquisition through  
126 the extracellular depolymerization of organic compounds (Piton et al. 2020b, a). A higher investment  
127 in resource acquisition traits (i.e. increased extracellular enzyme activities) is expected along a  
128 gradient of decreasing soil resource availability, paralleling a shift in plant resource acquisition  
129 strategy along the exploitative-conservative continuum (Piton et al. 2020b). Increased quantity (i.e.  
130 soil organic matter, N and P amounts) and quality (i.e. lower soil C/N, higher nitrate, ammonium  
131 contents) of available resources from directly assimilable fecal material enriched in nutrients (e.g.  
132 Fielding et al. 2013) or increased labile carbon inputs from root exudates (Hamilton and Frank 2001;  
133 Paterson et al. 2003; Hamilton et al. 2008) are expected to promote microbial communities (Wardle  
134 et al. 2004; Grigulis et al. 2013) with a high yield strategy characterized by a low investment in  
135 extracellular enzyme production (Malik et al. 2020; Piton et al. 2020b). On the opposite, a reduction  
136 of available resources quality should promote microbial communities with a resource acquisition  
137 strategy characterized by a high investment in extracellular enzymes targeting complex polymeric  
138 organic matter (Malik et al. 2020). Higher nitrogen availability in the form of labile compounds (amino  
139 acids,  $\text{NH}_4^+$  or  $\text{NO}_3^-$ ) resulting from herbivory should reduce the microbial demand for this element,  
140 resulting in a lower investment in N-acquiring enzymes. Yet, increased availability of labile C from  
141 root exudates following herbivory might also increase nutrient limitation of microbial communities,  
142 especially if herbivory stimulates plant productivity and associated nutrient acquisition. This would  
143 result in higher nutrient immobilization, which is more likely under less fertile conditions that offer low

144 resource availability for microbes. Considering the microbial resource acquisition strategy, along with  
145 herbivore traits, plant traits and soil characteristics is therefore a necessary step to develop a global  
146 multitrophic and mechanistic understanding of aboveground-belowground nutrient cycling.

147

148 Although the productivity and diet models focus on different axes of variations (ecosystem  
149 productivity and herbivore diet), they can be combined. In fertile ecosystems dominated by  
150 herbivores feeding on lower quality plants, the predictions of both models are aligned, pointing  
151 towards the dominance of high-quality plants and the acceleration of nutrient cycling. For infertile  
152 ecosystems populated by herbivores preferring higher quality plants, both models also predict similar  
153 outcomes, but this time foresee the dominance of low-quality plants, and the deceleration of organic  
154 matter cycling (Bardgett and Wardle 2010). However, in the two remaining cases the two models  
155 make opposite predictions. In infertile ecosystems inhabited by herbivores selecting low quality  
156 plants, nutrient cycling may be affected in both directions, depending on the relative strength of the  
157 various processes at play in the productivity and diet models. Similarly, herbivores feeding on high  
158 quality plants in fertile ecosystems may have contrasting effects on matter turn-over. For instance,  
159 under fertile conditions herbivores feeding on high quality plants can favor their dominance  
160 (Buckland and Grime 2000), presumably because high resource availability allows compensatory  
161 growth for these plant species. This may in turn promote nutrient cycling and soil fertility (Bardgett  
162 and Wardle 2010). However, if high-quality plants invest in defensive secondary compounds instead  
163 of displaying compensatory growth, and if the herbivores can cope with them, slow-growing species  
164 may become dominant and nutrient cycling may slow down.

165

166 Moreover, the productivity model focuses on the contrasting effects of herbivory along a gradient of  
167 plant productivity, but soil nutrient cycling is ultimately controlled by microbial communities, whose  
168 response to herbivory may rather depend on a gradient of soil resources, on which they rely more  
169 directly than plant productivity. Even though both gradients are often correlated, leading to productive  
170 ecosystems associated with low carbon sequestration (Wardle et al. 2004; Grigulis et al. 2013),  
171 decoupling can be observed (Piton et al. 2020b). Hence, the productivity and diet models should  
172 include the functional responses of belowground microbial communities in order to provide a  
173 completer and more mechanistic picture of herbivore-plant-soil interactions.

174

175 Since the existing frameworks provide either congruent or conflicting predictions, this calls for  
176 experimental evidence controlling for herbivore diet in ecosystems with contrasting plant productivity  
177 and soil resource levels, in order to test the effect of herbivory on microbial communities. In the  
178 present contribution, we bridge this gap with a semi-controlled experiment using insect-proof cages,  
179 where four types of grasslands (managed or natural, dominated by grasses or by forbs) in 12  
180 montane sites were subjected to herbivory by three grasshopper species which either preferred  
181 grasses, forbs or a mixture of the two. Following two years of herbivory, activities of extracellular soil  
182 enzymes specialized in carbon, nitrogen and phosphorus acquisition were measured, as well as  
183 nitrogen mineralization potential and microbial biomass. We hypothesized that the effect of herbivory  
184 on these soil microbial characteristics depends on the interaction between herbivore diet and  
185 ecosystem productivity.

186

187

## Material & methods

188

### Study sites and experimental design

189 The experiment was conducted in the French Pre-Alps, in North Vercors on the calcareous plateau  
190 of Autrans-Méaudre (45°10'N, 5°32'E). Four grassland types were chosen on the base of their  
191 botanical composition: extensively managed and fertilized grasslands dominated by the grass  
192 *Festuca rubra*, intensively managed and fertilized grasslands dominated by the grass *Lolium*  
193 *perenne*, natural grasslands dominated by forbs characterized by *Heracleum sphondylium* and  
194 *Chaerophyllum hirsutum* and natural warm grasslands mainly formed by the grass *Bromus erectus*.  
195 The coordinates of the 12 study sites are given in Sup. Tab. 1. All grasslands were composed of a  
196 mixture of forbs and grasses, although the dominant functional group depended on the grassland  
197 type (Sup. Fig. 2A). Three replicates per grassland type were randomly chosen in the study area, for  
198 a total of twelve sites ranging from 1000 to 1300 m.a.s.l. In each site, five 1m<sup>2</sup> plots (60 plots in total)  
199 were selected randomly within a 5m-radius and assigned to one of the five following grasshopper  
200 herbivory treatments: *Miramella alpina*, *Pseudochorthippus parallelus*, *Stauroderus scalaris*, an equal  
201 mixture of the three species, no grasshoppers (control). The grasshopper species were chosen  
202 according to their diet, as *M. alpina* prefers to feed on forbs, *P. parallelus* on grasses and *S. scalaris*  
203 mainly on grasses but also on forbs (Ibanez et al. 2013). Plots were covered by a 1m<sup>3</sup> metallic cage  
204 covered by insect-proof mesh (PE 22.30, 920 x 920 µm; DIATEX, Saint Genis Laval, France), into  
205 which the adult grasshoppers were introduced. The number of grasshoppers per cage was adjusted  
206 to fit 1-g of grasshopper for 300-g of plant aboveground biomass (dry mass), which corresponds to  
207 the maximal natural insect densities locally observed in the study area. The dry mass of each  
208 species and each sex was also considered, after preliminary measurements. Grasshoppers were  
209 present inside the cages during 65 days from the 2<sup>nd</sup> week of July until the 3<sup>rd</sup> week of September,  
210 during two consecutive years 2016 and 2017. During these periods, the number of grasshoppers per  
211 cage was checked every two weeks, including the control cages from which a few grasshoppers  
212 were occasionally removed.

213

### Soil characteristics

214 In mid-September 2017, four 10-g soil samples were collected in each plot at 5-cm depth, and then  
215 bulked. The samples were sieved at 5-mm and stored at 4°C before processing within 48h.  
216 Subsamples of 5-g of soil were dried at 70°C for 1 week to determine soil moisture, followed by 4h at  
217 550°C to determine soil organic matter (SOM) content. Soil subsamples were air dried and ground to  
218 powder to measure total C and N contents using a FlashEA 1112 elemental analyzer (Fisher  
219 Scientific Inc., Waltham, MA, USA), and to determine soil pH in a 1:2.5 (soil : distilled water) solution.  
220 Solution of 0.5M K<sub>2</sub>SO<sub>4</sub> was used to extract soil nitrate (NO<sub>3</sub><sup>-</sup>), ammonium (NH<sub>4</sub><sup>+</sup>), total dissolved  
221 nitrogen (TDN) (Jones and Willett 2006), and phosphate (PO<sub>4</sub><sup>-</sup>) on 10-g of fresh soil. N and P  
222 concentrations were measured on an automated photometric analyzer using standard colorimetric  
223 methods (Gallery Plus: Thermo Fisher Scientific, Waltham, Massachusetts, USA). Dissolved organic  
224 nitrogen (DON) was calculated as the difference between TDN and the mineral N (NO<sub>3</sub><sup>-</sup> + NH<sub>4</sub><sup>+</sup>).  
225

## 226 **Microbial biomass, activities and traits**

227 Microbial biomass nitrogen (MBN) content was based on the difference of soil N content before and  
228 after chloroform-fumigation extraction of 10 g of fresh soil (Vance et al. 1987). We then calculated  
229 MBN in  $\mu\text{gN/g}$  using a correction factor of 0.45 (Jenkinson et al. 2004).  
230 Potential nitrogen mineralization rates (PNM) were estimated after incubation under anaerobic  
231 conditions of 10 g of fresh soil for 7 days at 40°C in the dark (Wienhold 2007). Mineralized organic N  
232 was accumulated as  $\text{NH}_4^+$  during this incubation and PNM rates were calculated based on the  
233 difference between  $\text{NH}_4^+$  content before and after incubation and expressed as  $\mu\text{gN/g dry soil/day}$ .  
234 Microbial resource acquisition strategies were characterized using different microbial community-  
235 weighted mean traits (Piton et al. 2020b). We measured the potential activity of seven extracellular  
236 enzymes contributing to the degradation of C-rich substrates ( $\alpha$ -glucosidase,  $\beta$ -1,4-glucosidase,  $\beta$ -d-  
237 cellobiosidase and  $\beta$ -xylosidase), N-rich substrates ( $\beta$ -1,4-N acetylglucosaminidase and leucine  
238 aminopeptidase), and P-rich substrates (phosphatase) using standardized fluorimetric techniques  
239 (Bell et al. 2013). We homogenized 2.75 g of fresh soil (1 minute in a Waring blender) in 200 ml of  
240 sodium acetate buffer solution that was adjusted at the mean soil pH observed in the present study  
241 (i.e. 6.2). The resulting soil slurries were added in duplicates to 96-deep-well microplates. We then  
242 added a substrate solution for each enzyme. Duplicated standard curves (0–100- $\mu\text{M}$  concentration)  
243 were prepared for each soil sample by mixing 800 ml of soil slurry with 200 ml of 4-  
244 methylumbelliferone (MUB) or 7-amino-4-methylcoumarin (MUC) in 96-deep-well microplates.  
245 Microplates were incubated during 3hrs (dark, 175 rpm, 20°C), and centrifuged at 2,900 g for 3 min.  
246 Soil slurries (250  $\mu\text{l}$ ) were then transferred into black Greiner flat-bottomed microplate and scanned  
247 on a Varioskan Flash (Thermo Scientific) reader using excitation at 365 nm and emission at 450 nm  
248 (Bell et al. 2013). For each soil sample, the four enzyme activities degrading C-rich substrates, the  
249 two enzymes activities degrading N-rich substrates and all the seven enzymes were summed to  
250 obtain extracellular enzyme activity for C-rich substrates (EEC), N-rich substrates (EEN)  
251 respectively. Phosphatase activity was used to represent extracellular enzyme activity for P-rich  
252 substrates (EEP). EEC, EEN and EEP were calculated per gram of dry soil per hour (global  
253 activities,  $\text{nmol activity/ g dry soil/h}$ ). Microbial resource limitation and associated trade-offs between  
254 C and N acquisition was assessed through the calculation of the ecoenzymatic ratio EEC:EEN  
255 (Sinsabaugh et al. 2009).

## 256 **Vegetation surveys and plant biomass**

257 In order to quantify the diet of each grasshopper species, a visual estimation of herbivory intensity  
258 was conducted in August 2016. Ten individuals belonging to each of the 6 most dominant plant  
259 species in each site were inspected for herbivory marks by grasshoppers and the percentage of leaf  
260 area eaten was visually estimated.

261  
262 A botanical survey was conducted at the beginning of the experiment (June 2016) and after one year  
263 of controlled herbivory (June 2017). The point quadrat method was used (Levy and Madden 1933;  
264 Vittoz and Guisan 2007; Lavorel et al. 2008), with 50 regularly spaced points in each 1m<sup>2</sup> cage. This  
265 method allows to determine the relative abundance of the most common species in each plot, but  
266 does not constitute a complete inventory of the specific richness. To assess the effect of herbivory,

267 we computed the proportion of forbs in 2017 minus the proportion of forbs in 2016 in each cage. At  
268 the end of the experiment in September 2017 the aboveground biomass was harvested in each plot,  
269 dried 48h at 40°C, sorted into forbs and grasses and weighed. In order to get a community-level  
270 measure of leaf C/N ratio, a representative sample of the harvested biomass was grounded to  
271 powder, homogenized, and 5 mg of the leaf powder were then analyzed for carbon and nitrogen  
272 concentration using a CHN analyser (FlashEA 1112, ThermoFisher Scientific, MA, USA). These  
273 measures also provided the amount of nitrogen in aboveground plant biomass per unit area (gN/m<sup>2</sup>,  
274 N<sub>B</sub>).

## 275 **Statistical analysis**

276 Linear mixed models in which the random effects corresponded to the 12 sites (with 5 pseudo-  
277 replicas per site) were used to predict the logit of the total percentage of leaf biomass eaten in  
278 function of grassland type, herbivore identity, plant functional group (forbs vs grasses), and the  
279 interaction between these three factors.

280  
281 Coinertia analysis (Dray et al. 2003) was used to quantify the coefficient of correlation (RV  
282 coefficient, ranging between 0 and 1) between vegetation characteristics (total aboveground  
283 biomass, forbs biomass, N<sub>B</sub>, community-level plant C/N ratio, plant Shannon index), soil abiotic  
284 characteristics (water content, pH, SOM, TDN, phosphorus content, C/N ratio) and soil microbial  
285 characteristics (EEC, EEN, EEP, EEC:ENN ratio, PNM and microbial biomass). Redundancy  
286 analysis (RDA, Borcard et al. 1992) was used to quantify the amount of variation of either microbial,  
287 soil abiotic and vegetation characteristics explained by either grassland type or site.

288  
289 In order to quantify the effect of herbivory on the six microbial characteristics, the standardized  
290 response to herbivory was calculated as the difference between grasshopper treatments and the  
291 control treatment (no grasshoppers) of the same site, divided by the standard deviation of the  
292 corresponding site. Coinertia analysis was used to test if the standardized responses depended on  
293 soil abiotic and/or on vegetation characteristics.

294  
295 To test if these effects of herbivory depended on grassland characteristics (either SOM or plant  
296 productivity N<sub>B</sub>), and on herbivore identity, the standardized responses of microbial characteristics  
297 were then used as a response variable in separate linear mixed models including sites as random  
298 effects. Since the warm grassland #1 had a particularly high SOM, the same models as above were  
299 performed excluding this site to check if it had a disproportionate effect on the results.

300  
301 In all mixed models, the denominator degrees of freedom were calculated using Satterthwaite's  
302 approximation (Satterthwaite 1946). Type III sums of squares were used for models including  
303 interactions between factors. For each model, the normality and homoscedasticity hypothesis were  
304 visually checked. All statistical analyses were performed with the R software (R Core Team 2019),  
305 using the packages lmerTest (Kuznetsova et al. 2017) and ade4 (Dray and Dufour 2007).

306  
307



308

309

310

## Results

311

### Leaf quality and consumption

312 The percentage of leaf area eaten depended on a large part on the interaction between plant  
313 functional group and herbivore identity ( $p < 0.001$ ), indicating that the selected grasshoppers had  
314 contrasted diets as expected. *M. alpina* preferred forbs over grasses (7% of leaf area consumed vs  
315 3.2%), *S. scalaris* preferred grasses over forbs (7.2% vs 3%), while *P. parallelus* ate almost  
316 exclusively grasses (11.3% vs 0.9%, Sup. Fig. 1A). When these three species were combined,  
317 grasses were slightly more impacted than forbs (7.4% vs 4.8%). The overall effect of grassland type  
318 on the leaf area eaten was not significant ( $p = 0.50$ ), which reflects the fact that the number of  
319 introduced grasshoppers in each cage depended on the estimated plant standing biomass. However,  
320 there was a significant interaction between grassland type and plant functional group ( $p < 0.001$ ),  
321 because in forbs dominated communities grass species were much more heavily impacted than forb  
322 species (15.3% vs 2.7%), whereas in the other grassland types both functional groups were  
323 consumed in similar proportions (Sup. Fig. 1B). The p-value of the three-way interaction between  
324 plant functional group, grassland type and grasshopper identity equaled 0.58, which indicates that  
325 the diet of each grasshopper species did not depend on grassland type. The elementary analysis of  
326 fresh plant material showed that the leaf C/N ratio was higher for grasses than for forbs, whatever  
327 the grassland type ( $p < 0.001$  in all cases). However, the magnitude of the difference depended on  
328 grassland type (interaction between plant functional group and grassland type,  $p < 0.001$ ). The largest  
329 difference was in warm grasslands (forbs: 25, grasses: 38) and the smallest in communities  
330 dominated by forbs (forbs: 22, grasses: 27, Sup. Fig. 2). The botanical survey conducted after one  
331 year of herbivory revealed that the proportion of forbs did not vary in most treatments ( $p > 0.4$ ), except  
332 in the cages containing the forbs-feeding *M. alpina* where forbs declined by 7.2% (Sup. Fig. 3,  
333  $p = 0.013$ ).

334

### 335 Relations between vegetation, soil microbial and abiotic 336 characteristics

337 The coinertia analysis between six microbial soil characteristics (nitrogen mineralization potential,  
338 EEN, EEC, EEP, microbial biomass, EEC/EEN ratio) and six abiotic soil characteristics (water  
339 content, pH, SOM, TDN, phosphorus content, C/N ratio) had a RV coefficient of 0.59 ( $p < 0.001$ ). One  
340 axis of covariation between the two types of variables corresponds to an anticorrelation between soil  
341 pH and soil phosphorus content on the one hand, and EEP on the other hand, as well as EEC/EEN  
342 ratio to a lesser extent (Figure 1A). Therefore, in acidic soils having low phosphorus content,  
343 microbes invested more in phosphorus acquisition enzymes and slightly more on carbon than  
344 nitrogen acquisition enzymes. Another axis of covariation was between the abiotic characteristics  
345 TDN, SOM and water content, and the microbial characteristics EEC and PNM. The RDAs indicate  
346 that grassland types were heterogeneous with respect to soil characteristics, grassland type  
347 explaining 28% of the variation for the six soil abiotic characteristics and only 9% for the six microbial

348 characteristics (Sup. Fig. 3). In contrast, the soil characteristics were homogeneous at the site level  
349 (Sup. Fig. 3).

350 Turning to vegetation, the coinertia analysis between the six abiotic soil characteristics and the five  
351 vegetation characteristics (total aboveground biomass, forbs biomass,  $N_B$ , community-level plant C/N  
352 ratio, plant Shannon index) had a RV coefficient of 0.22 ( $p < 0.001$ ). Ecosystem productivity was  
353 negatively associated with SOM, pH and soil phosphorus content, and was not linked to TDN (Figure  
354 1B). The RV coefficient of the coinertia between five vegetation characteristics and the six microbial  
355 characteristics was lower (0.29,  $p < 0.001$ ), which suggested that the microbial soil characteristics  
356 were more related to soil abiotic characteristics than to vegetation characteristics. The EEC/EEN  
357 ratio covaried with ecosystem productivity (aboveground biomass and  $N_B$ ) while EEC, EEN and PNM  
358 was associated with the leaf C/N ratio and the proportion of grasses (Figure 1C). The RDA indicates  
359 that grassland types were homogeneous with respect to vegetation characteristics with 53% of  
360 variation explained by grassland type (Sup. Fig. 3). Indeed, warm grasslands were characterized by  
361 high leaf C/N ratio, forb-dominated grassland by a high proportion of forbs and a high Shannon  
362 diversity, intensive grasslands by a high biomass and nitrogen content, while extensive grasslands  
363 had intermediate vegetation characteristics. Means  $\pm$  sd of each vegetation, soil microbial and abiotic  
364 characteristics are given for each of the 12 sites in Sup. Tab. 1.

## 365 **Effect of herbivory on microbial characteristics.**

366 The coinertia analysis revealed that standardized responses of microbial characteristics to herbivory  
367 were related to soil abiotic characteristics (RV=0.22,  $p < 0.001$ ). The coinertia analysis (Figure 2) and  
368 the linear mixed models (Figure 3) both indicate that the responses of PNM and EEN to herbivory  
369 increase with SOM, as well as EEC and EEP although to a lesser extent (see Figure 3 for the p-  
370 values of the linear mixed models). More specifically, below 10% of SOM herbivory decreased PNM  
371 and soil enzymatic activities while above 15% of SOM herbivory had a positive effect on these  
372 variables. The response of microbial biomass to herbivory did not depend on SOM ( $p=0.75$ ) but  
373 varied according to TDN. In sites with TDN below 30  $\mu\text{gN/g}$ , herbivory increased microbial biomass,  
374 while in sites with TDN above 50  $\mu\text{gN/g}$  herbivory decreased microbial biomass (Figure 3E,  
375  $p=0.014$ ). Finally, the response of EEP to herbivory was positively related to pH ( $p=0.007$ ). In  
376 contrast, the effect of herbivory on microbial characteristics did not depend on vegetation  
377 characteristics (RV=0.09,  $p=0.17$ ). In particular, neither plant biomass nor productivity ( $N_B$ ) were  
378 related to changes in the standardized responses of microbial characteristics (details not shown,  
379  $p > 0.05$ ). In all cases, the effects of herbivory on microbial characteristics depended neither on  
380 herbivore diet nor on the interaction between herbivore diet and ecosystem characteristics such as  
381 SOM, TDN or productivity (details not shown,  $p > 0.05$ ).

## 382 Discussion

### 383 Covariations between ecosystem properties

384 We first explore the covariations between vegetation, soil biotic and soil abiotic characteristics, in  
385 order to better identify the ecological differences between the studied grasslands. In the next  
386 sections, we will discuss how these differences conditions different types of responses to herbivory.  
387 The comparison of the 12 study sites indicated that, in line with the productivity model, soil C  
388 sequestration measured by SOM was low in sites having the higher plant biomass (Figure 1B).  
389 However, there was a positive relationship between SOM and TDN (Figure 1A), and no relationship  
390 between TDN and plant biomass (Figure 1B). TDN was also highly correlated with dissolved organic  
391 nitrogen, as in e.g. Chu & Grogan (2010). Since DON is mostly issued from SOM (Van Kessel et al.  
392 2009), this explains the correlation between SOM and TDN. The decoupling between TDN and plant  
393 biomass might be explained by management, since extensive and intensive grasslands are fertilized  
394 each year; intensive grasslands being the most fertilized and productive ones (Piton et al. 2020b &  
395 Sup. Fig. 3). Nutrients available after fertilization are likely rapidly assimilated by the fast growing and  
396 productive plant species, resulting in both high productivity and low measured nutrient availability.  
397 After plant growth, mowing exports nutrients away from these grasslands, while fertilization  
398 reintroduces the lacking nutrients. Therefore, in managed grasslands a high proportion of annual  
399 primary production is consumed and indirectly returned to the soil through subsequent fertilization, as  
400 are natural fertile ecosystems in the productivity model (Bardgett and Wardle 2010).

401 Turning to microbes, those living in soils with high SOM and TDN were more active and accelerated  
402 the nutrient cycle (high PNM and ECC, Figure 1A). However, microbial biomass did not increase with  
403 SOM, which implies that high SOM comes along with higher mass-specific extracellular activities for  
404 carbon uptake and higher mass-specific nitrogen mineralization, which corresponds to a resource  
405 acquisition (A) strategy (sensu Malik et al. 2020). Microbial biomass did not covary with any soil  
406 characteristic (Figure 1 A & C), as in Farrell et al. (2011, see their Table 1) and Chu & Grogan (2010  
407 see their Tables 1 & 2). This may reflect the fact that microbial biomass results from the complex  
408 interplay between potentially opposing factors such as microbial resource use efficiency, resource  
409 acquisition and resource availability, itself depending on SOM and plant input quantity and quality  
410 (e.g. root exudates). Moreover, microbial biomass depends on the whole soil trophic network  
411 (Calderón-Sanou et al. 2021). This result stresses the importance to consider the resource  
412 acquisition strategy of soil microbes and not only their biomass to understand their response to  
413 environmental gradients and their effect on nutrient recycling in soil (Piton et al. 2020a). Recent  
414 literature has proposed that microbes adopt an A strategy either when resources are scarce (Malik et  
415 al. 2019, 2020; Piton et al. 2020b), or when resources are abundant (Wood et al. 2018). Since  
416 microbes rely on two main carbon sources, not only soil organic matter but also those exuded by  
417 plants in the rhizosphere, it is necessary to explore the relationships between the traits of the  
418 microbial and plant communities. We found that the A strategy comes along with plant communities  
419 having higher leaf C/N ratios (Figure 1C), which corresponds to conservative plant resource use  
420 strategy. Since exploitative plants produce more root exudates (Williams et al. 2022), a labile carbon  
421 source would be available to microbes in exploitative plant communities, favoring a high yield (Y)

422 strategy characterized by low enzyme production, according to Malik et al. (2020). In contrast, in  
423 conservative plant communities, microbes would lack labile carbon source and rely more on soil  
424 organic matter. This implies an A strategy characterized by the production of extracellular enzymes  
425 related to carbon acquisition, which ultimately releases nitrogen from soil organic matter (Figure 1C).

426 In summary, the pattern of covariations between ecosystem properties suggests a distinction  
427 between two types of grasslands. On the one hand, the most productive sites (>400 g/m<sup>2</sup>) are  
428 characterized by exploitative plants, by soils having relatively low SOM (<10%) and TDN (<40 µg/g)  
429 contents, and by Y-strategist microbes producing fewer extracellular enzymes, possibly because of  
430 higher C supply in the rhizosphere (Table 1, left column). On the other hand, in the least productive  
431 dominated by conservative plants, the SOM and TDN contents are higher and the microbial  
432 community is characterized by an A strategy since microbes need to produce extracellular enzymes  
433 to get access to SOM resources (Table 1, right column).  
434

## 435 **Herbivory effects on enzymatic activities**

436 The present section explores if the effect of herbivory on microbial communities depend on the  
437 grassland types described above. We found a covariation between SOM and the responses of soil  
438 enzymatic activities and PNM to herbivory (Figure 2). Herbivory had a negative effect on soil  
439 enzymatic activities and PNM when SOM was below 10%, and a positive effect when SOM was  
440 above 15% (Figure 3). This means that herbivory can increase or decrease nutrient cycling  
441 depending on soil conditions, in relation with microbial strategies. In soils rich in SOM, A strategists  
442 invested even more in extracellular enzymes in response to herbivory. Herbivory provides fresh  
443 organic matter (FOM such as green fall, feces, cadavers) to the soil, which contains nutrients that are  
444 more easily available than SOM but which nevertheless needs to be depolymerized before  
445 assimilation (e.g. chitin). Since in sites rich in SOM, A strategists possess the enzymatic traits that  
446 give them access to this resource, this would explain why A strategists invest more in extracellular  
447 enzymes following herbivory. Consequently, the enhancement of extracellular enzymatic activities  
448 might have cascaded on PNM, as expected according to the key role of organic matter  
449 depolymerization in N mineralization (Schimel and Bennett 2004). In contrast, in low SOM soils Y  
450 strategists decrease even more their investment in extracellular enzymes. A possible explanation is  
451 that litter inputs are not the only consequences of herbivory on ecosystem functioning (Hunter et al.  
452 2012). In particular, herbivory stimulates root exudation (Holland 1995; Holland et al. 1996), which  
453 increases microbial activity in the rhizosphere and subsequently favors compensatory plant growth  
454 (Hamilton and Frank 2001; Hamilton et al. 2008). Williams et al. (2022) found that root exudation is  
455 more intense in exploitative than in conservative plants, but it is not known if the effect of herbivory  
456 on root exudation depends on plant functional groups. If the stimulation of root exudation by  
457 herbivory is more intense for exploitative than for conservative plants, this would explain the finding  
458 that herbivory decreased the production of extracellular enzymes in sites having low SOM, since they  
459 are dominated by exploitative plants. However, although the effect of herbivory on soil enzymatic  
460 activities and PNM depended on SOM (Figure 3), it did not directly depend on the mean leaf C/N  
461 ratio (details not shown,  $p>0.05$ ). Root exudation following herbivory has been found to enhance  
462 NMP for the benefit of plants (Hamilton and Frank 2001), while our results suggest the opposite.

463 However, inputs of available C may also result in N immobilization in the microbial biomass (Lovett  
464 and Ruesink 1995), which is this time in line with our results. This calls for both qualitative and  
465 quantitative characterization of root exudation in future works to further elucidate how soil and plant  
466 properties jointly control ecosystem response to herbivory.

467  
468 Following the productivity model, we initially postulated that in more productive and fertilized sites  
469 having low SOM content, herbivory would enhance nitrogen mineralization. We found the opposite,  
470 presumably because of the stimulation of root exudation, as discussed above. Furthermore,  
471 according to the productivity model when herbivores accelerate plant succession this favors  
472 conservative plants with higher leaf C/N ratio, thereby reducing nutrient mineralization and enhancing  
473 soil C sequestration (Wardle et al. 2004). Therefore, herbivory would decelerate nitrogen  
474 mineralization in sites having high SOM content. The grasshopper *M. alpina* negatively impacted  
475 forbs during the experiment, whatever the sites (-7.2% between 2016 and 2017), but this was not  
476 followed by a particular effect of this species on soil properties. The two other species of insect did  
477 not change plant community composition (Sup. Fig. 2). Plant community shifts induced by herbivory  
478 are more likely a longer-term effect of herbivory than the two-years duration of the experiment.  
479 Herbivory may also decelerate nitrogen mineralization through the induction of recalcitrant plant  
480 secondary compounds (Schultz and Baldwin 1982; Rhoades 1985; Agrawal 1999) which  
481 subsequently slows down litter decomposition (Findlay et al. 1996; Hattenschwiler and Vitousek  
482 2000). However, we did not find any effect of herbivory on litter decomposition (Ibanez et al. 2021).

483  
484 Turning to microbial biomass, herbivory had a positive effect in sites having low TDN, and a negative  
485 effect when TDN was high (Figure 3E), but contrary to the enzymatic activities the effect of herbivory  
486 on microbial biomass did not depend on the SOM content (Figure 2A). In previous studies, herbivory  
487 increased microbial biomass through an input of labile C contained in the feces (Lovett and Ruesink  
488 1995; Van Der Wal et al. 2004). Herbivory was also found to decrease microbial biomass when  
489 plants' C inputs to the soil are instead reduced due to herbivores respiration (Sankaran and  
490 Augustine 2004). Since TDN was positively linked with mean leaf C/N ratio (Figure 1B), itself being  
491 negatively correlated to root exudates (Williams et al. 2022), we hypothesize that in sites with low  
492 TDN, herbivory triggered an input of labile C into the rhizosphere, thereby stimulating the growth of  
493 microbial biomass, whereas in sites with high TDN, herbivory reduced the plants C inputs, with a  
494 negative impact on microbial biomass.

## 495 **No effect of herbivore diet**

496  
497 The proportion of forbs in the diet of *M. alpina* was the highest, followed by the mixed feeder *S.*  
498 *scalaris* and then by the grass feeder *P. parallelus* (Sup. Fig. 1A), in line with previous studies  
499 (Ibanez et al. 2013). Since the grasshoppers' diet did not depend on the grasslands they were  
500 introduced in, it was possible to test if the effects of herbivory on soil enzymatic activities depended  
501 on their diet. The diet model predicts that herbivores feeding on high quality plants should favor the  
502 accumulation of poor-quality litter and thereby slow down nutrient cycling, and that herbivores  
503 feeding on low quality plants should favor the accumulation of high-quality litter, with an accelerating  
504 effect on nutrient cycling (Belovsky and Slade 2000).

505

506 In the present study, high quality plants characterized by low leaf C/N ratio (Sup. Fig. 2) were  
507 consumed preferentially by the forb feeder *M. alpina* (Sup. Fig. 1A), which decreased their relative  
508 abundance by about 7% (Sup. Fig. 3). In warm and forb-dominated prairies, litter decomposition  
509 during winter was faster for forbs (28% of mass loss) than for grasses (17%), although in extensive  
510 and intensive prairies winter decomposition was similar for both plant functional groups, due to the  
511 intermittent presence of snow cover (Ibanez et al. 2021). In any case, this suggests that the year-  
512 round decomposition rate is higher for forbs than for grasses, as it is generally the case (Tilman  
513 1988). Given that *M. alpina* modifies the balance between forbs and grasses, this should affect the  
514 overall decomposition rate, with potential impacts on soil microbial communities. However, *M. alpina*  
515 did not have any contrasted effect on soil microbial characteristics, in comparison to the other  
516 grasshopper species. Perhaps this would have required a heavier impact on the relative abundance  
517 of forbs, rather than only 7%.

518

519 Lower quality plants (high leaf C/N ratio) were consumed preferentially by the mixed feeder *S.*  
520 *scalaris* and almost exclusively by the grass feeder *P. parallelus* (Sup. Fig. 1A), without any  
521 subsequent variation of the proportion of forbs and grasses in the plant communities (Sup. Fig. 3).  
522 This might be explained by plant compensatory growth, especially in the case of exploitative grasses  
523 (Barton 2016). Instead conservative grass species are less tolerant to herbivory (Avanesyan 2016),  
524 however in communities dominated by conservative grasses (e.g. *Bromopsis erecta*) grass feeders  
525 did not decrease the relative abundance of grasses, presumably because grasses were highly  
526 dominant in these communities. In any case, grass feeders did not have any distinguishable effect on  
527 soil microbes, relatively to the other grasshopper species. Previous short-term experiments using  
528 similar insect loads have reported that the effects of grasshoppers on soil processes depended on  
529 their diet type (e.g. Schmitz 2008; Belovsky and Slade 2018). Our findings question the generality of  
530 these results, since we found that the effect of herbivory on enzymatic activities did not depend on  
531 grasshopper species identity, nor on the interaction between grasshopper species and ecosystem  
532 characteristics such as SOM content.

## 533 Conclusion

534

535 Previous work showed that herbivory has contrasted impacts on ecosystem functioning in general  
536 (Brown and Gange 1992; Bardgett 2005; Schmitz 2008), and on soil microbes in particular (Denton  
537 et al. 1998; Stark and Grellmann 2002), in function of the environmental conditions and of the diet of  
538 herbivores. The motivation of this work was to observe such contrasted impacts in a single  
539 experiment across different types of grasslands, using herbivores having different diets, in order to  
540 better understand the pathways which create this apparently idiosyncratic pattern. We did not find  
541 any interaction between ecosystem productivity and herbivore diet on soil microbial characteristics,  
542 contrary to our expectation. However, the effects of herbivory on soil microbes depended on several  
543 properties of the 12 study sites. Table 1 summarizes our main findings and can provide some lines of  
544 interpretation, although its dichotomic schematization does not fully represents the  
545 multidimensionality of the results (Figure 1-3). On the one hand, the most productive sites were  
546 characterized by a higher biomass of exploitative plant species which depleted N resources in the

547 soil, and by yield-strategists microbes having a smaller investment in extracellular enzymes. Since  
548 exploitative plant species tend to produce more root exudates (Williams et al. 2022), we postulate  
549 that herbivory increased C supply in the rhizosphere (e.g. Holland et al. 1996; Hamilton and Frank  
550 2001), which would explain the observed increase in microbial biomass and the lesser production of  
551 extracellular enzymes. On the other hand, the least productive sites were characterized by a lower  
552 biomass of conservative plants, which led to the sequestration of soil C, and by acquisition-  
553 strategists microbes having a larger investment in extracellular enzymes. We hypothesize that, in  
554 those sites, the consumption of plants results in lower soil C inputs due to herbivore respiration  
555 (Sankaran and Augustine 2004), which would explain why herbivory eventually decreased microbial  
556 biomass and increased the investment in extracellular enzymes in these less productive sites.  
557 Although the framework presented in Table 1 has some similarities with the productivity model  
558 (Bardgett and Wardle 2010), our findings point towards an acceleration of N cycling in less  
559 productive sites and a deceleration in more productive sites, in opposition with the productivity  
560 model. However, both frameworks do not consider the same time scales. The present experiment  
561 was conducted over two years and focuses on physiological time scales (root exudation, enzyme  
562 production), while the productivity model encompasses plant community dynamics, which occurs on  
563 longer time scales. In any case, we are convinced that none of these frameworks fully grasp the  
564 complex relationships between plants, soil, microbes and the effects of herbivory, which are most  
565 likely multidimensional. At the very least, these frameworks have some heuristic value and can be  
566 used for the design of future experiments.

567



568

## Figures & Tables

### 569 Figure 1

570 Coinertia of (A) soil microbial and abiotic characteristics, (B) soil abiotic and vegetation  
571 characteristics and (C) microbial and vegetation characteristics. tdn=total dissolved nitrogen,  
572 hum=soil water content, som=soil organic matter, CN=soil C/N ratio, pho=soil phosphorus content,  
573 PNM=potential nitrogen mineralization, mbn=microbial biomass, EEN, EEC, EEP= extracellular  
574 enzyme activities related to either nitrogen, carbon or phosphorus, ratio=EEC/EEN,  
575 plantCN=community-level plant C/N ratio, biom=total aboveground plant biomass, forbs=  
576 biomass (g), N\_B=nitrogen content in total aboveground plant biomass (N<sub>B</sub>), shan=Shannon  
577 index of plants.  
578

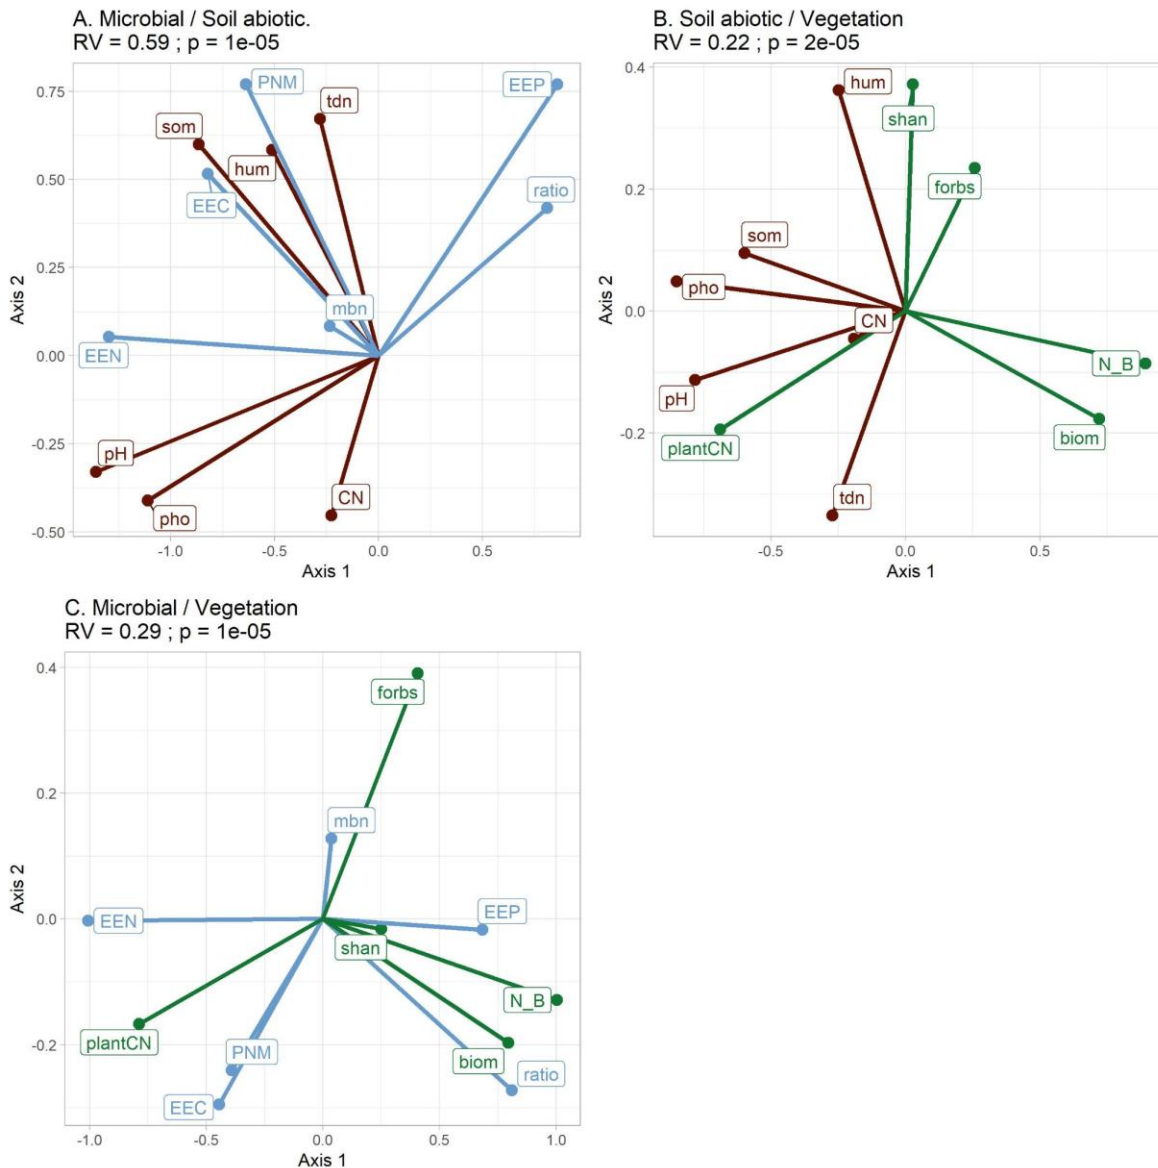

579

580

## Figure 2

581

582

583

584

585

586

587

588

589

Coinertia of soil abiotic characteristics and the standardized response to herbivory of microbial characteristics. (A) Canonical weights of soil abiotic characteristics (in brown) and standardized response to herbivory of microbial characteristics (in purple). (B) The 48 arrows correspond to all the plots containing grasshoppers. The soil abiotic characteristics are at the beginning of the arrows, the standardized response to herbivory of microbial characteristics are at their end. tdn=total dissolved nitrogen, hum=soil water content, som=soil organic matter, CN=soil C/N ratio, pho=soil phosphorus content, PNM=potential nitrogen mineralization, mbn=microbial biomass, EEN, EEC, EEP=extracellular enzyme activities related to either nitrogen, carbon or phosphorus, ratio=EEC/EEN.

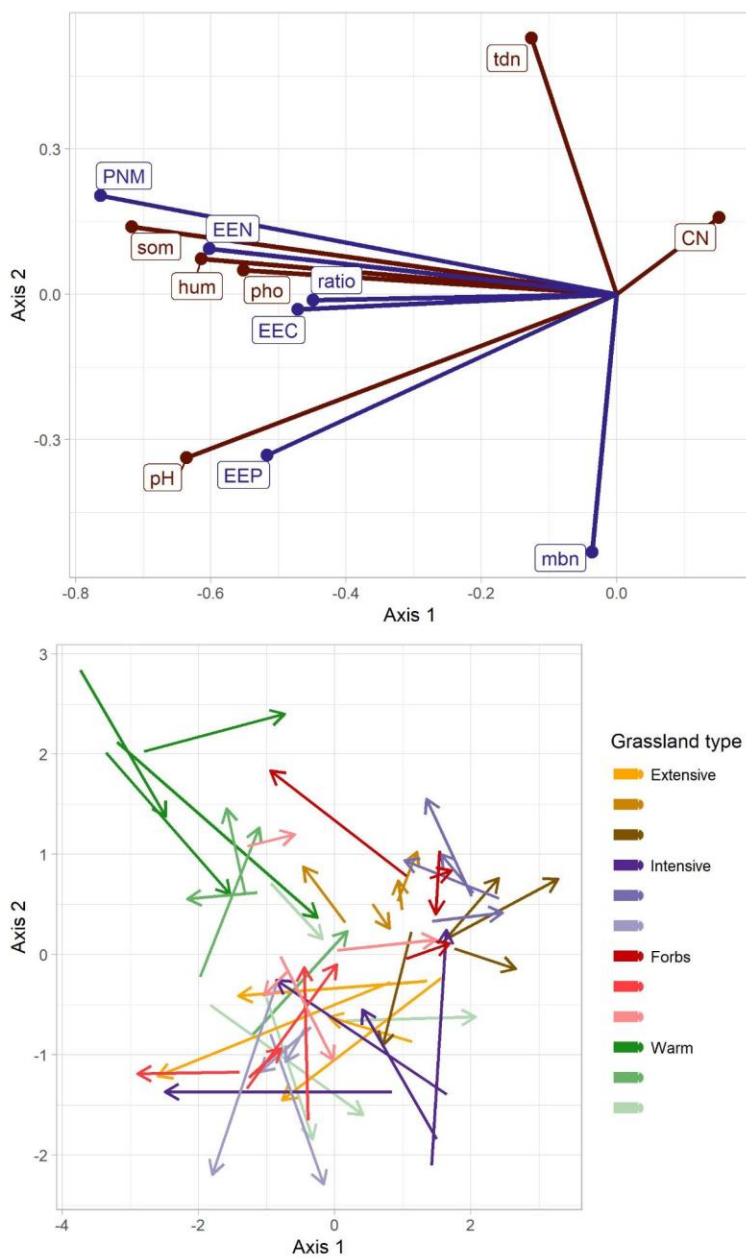

590

591

592

## Figure 3

593

594

595

596

597

598

Relationship between soil organic matter and the standardized response to herbivory, calculated as the difference between each grasshopper treatment and the control treatment (no grasshoppers) of the same site, divided by the standard deviation of this site.  $p$  is the  $p$ -value of the linear mixed model including all sites (continuous regression line), while  $p'$  excludes the warm grassland #1 having SOM values  $>30$  (dashed regression line).

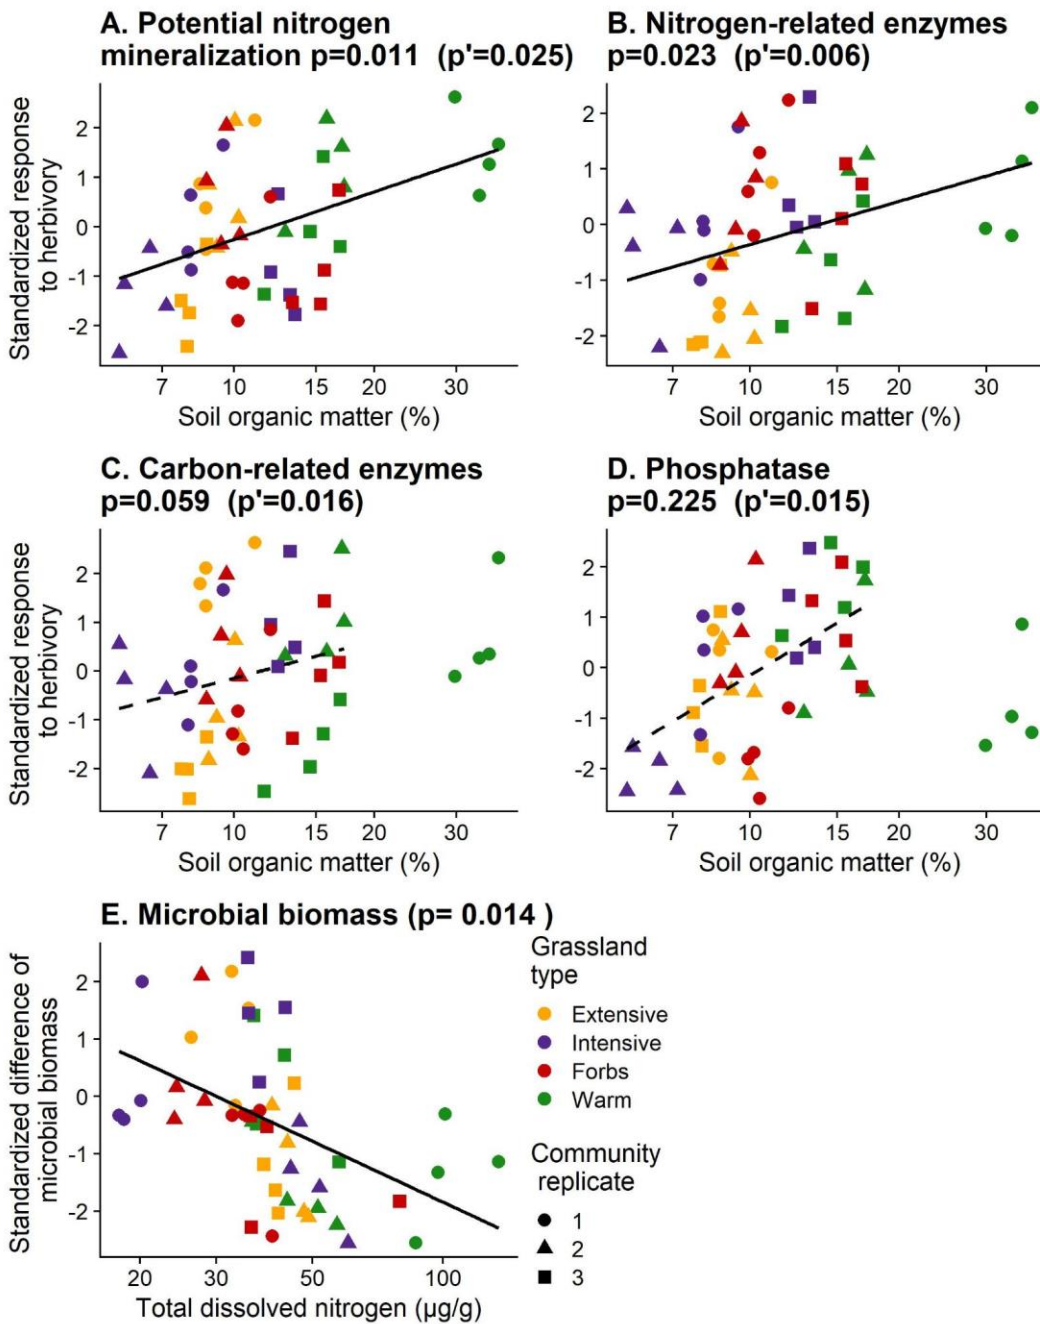

599

600  
601  
602

## Table 1

Schematic representation of the main results, and their articulation with previous works.

|                                      | Most productive sites                                              | Least productive sites                                            | Source                                                                                     |
|--------------------------------------|--------------------------------------------------------------------|-------------------------------------------------------------------|--------------------------------------------------------------------------------------------|
| Plants                               | High biomass                                                       | Low biomass                                                       | Figure 1                                                                                   |
|                                      | Low leaf C/N                                                       | High leaf C/N                                                     | Figure 1                                                                                   |
|                                      | Exploitative plants                                                | Conservative plants                                               | Figure 1                                                                                   |
|                                      | High C supply in the rhizosphere                                   | Low C supply in the rhizosphere                                   | Williams et al. 2020                                                                       |
| Soil                                 | Low soil organic matter                                            | High soil organic matter                                          | Figure 1                                                                                   |
|                                      | Low total dissolved nitrogen                                       | High total dissolved nitrogen                                     | Figure 1                                                                                   |
| Microbes                             | Low extracellular enzymes                                          | High extracellular enzymes                                        | Figure 1                                                                                   |
|                                      | High yield strategy Y                                              | Resource acquisition strategy A                                   | Malik et al. 2020                                                                          |
| Effects of herbivory on microbes     | Decreases extracellular enzymes                                    | Increases extracellular enzymes                                   | Figures 2 & 3                                                                              |
|                                      | Decreases mineralization                                           | Increases mineralization                                          | Figures 2 & 3                                                                              |
|                                      | Increases microbial biomass                                        | Decreases microbial biomass                                       | Figures 2 & 3                                                                              |
|                                      | Increases C supply in the rhizosphere (root exudates) <sup>1</sup> | Herbivore respiration decreases C inputs to the soil <sup>2</sup> | <sup>1</sup> : e.g. Hamilton & Frank 2001<br><sup>2</sup> : e.g. Sankaran & Augustine 2004 |
| Prediction of the productivity model | Herbivory retards plant succession, which accelerates N cycling    | Herbivory favors plant succession, which decelerates N cycling    | Bardgett & Wardle 2010                                                                     |

603  
604

## 605 **Acknowledgements**

606 This work was funded by the ECO-SERVE project through the 2013–2014 BiodivERsA/FACCE-JPI  
607 joint call for research proposals, with the national funders ANR, NWO, FCT (BiodivERsA/001/2014),  
608 MINECO, FORMAS and SNF. This work was also funded by the Alpine Ecology Lab. We thank the  
609 municipality of Autrans-Méaudre, the local farmers and the Refuge de Gève for their authorization to  
610 access the study sites, Jonathan Crison for his hospitality. We are grateful to Jean-Noël Avriillier,  
611 Annie Millery, Hugo Girard, Matteo Tolosano, Louise Maris, Pablo Raguet, Océane Guillot, Jessica  
612 Barbe & Alison Dillien for their assistance during field and lab work.

613

## 614 **References**

- 615 Agrawal AA (1999) Induced responses to herbivory in wild radish: effects on several herbivores and  
616 plant fitness. *Ecology* 80:1713–1723
- 617 Avanesyan A (2016) Tolerance of native and exotic prairie grasses to herbivory by *Melanoplus*  
618 grasshoppers: application of a nondestructive method for estimating plant biomass changes  
619 as a response to herbivory1. *J Torrey Bot Soc* 144:15–25
- 620 Bakker ES, Olf H, Boekhoff M, et al (2004) Impact of herbivores on nitrogen cycling: contrasting  
621 effects of small and large species. *Oecologia* 138:91–101. [https://doi.org/10.1007/s00442-](https://doi.org/10.1007/s00442-003-1402-5)  
622 003-1402-5
- 623 Bardgett R (2005) *The biology of soil: a community and ecosystem approach*. Oxford university  
624 press
- 625 Bardgett RD, Wardle DA (2010) *Aboveground-belowground linkages: biotic interactions, ecosystem*  
626 *processes, and global change*. Oxford University Press Oxford
- 627 Bardgett RD, Wardle DA (2003) Herbivore-mediated linkages between aboveground and  
628 belowground communities. *Ecology* 84:2258–2268
- 629 Bell CW, Fricks BE, Rocca JD, et al (2013) High-throughput fluorometric measurement of potential  
630 soil extracellular enzyme activities. *JoVE J Vis Exp* e50961
- 631 Belovsky GE, Slade JB (2000) Insect herbivory accelerates nutrient cycling and increases plant  
632 production. *Proc Natl Acad Sci* 97:14412–14417. <https://doi.org/10.1073/pnas.250483797>
- 633 Belovsky GE, Slade JB (2018) Grasshoppers affect grassland ecosystem functioning: Spatial and  
634 temporal variation. *Basic Appl Ecol* 26:24–34
- 635 Borcard D, Legendre P, Drapeau P (1992) Partialling out the spatial component of ecological  
636 variation. *Ecology* 73:1045–1055
- 637 Brown VK, Gange AC (1992) Secondary plant succession: how is it modified by insect herbivory?  
638 *Vegetatio* 101:3–13
- 639 Buckland SM, Grime JP (2000) The effects of trophic structure and soil fertility on the assembly of  
640 plant communities: a microcosm experiment. *Oikos* 91:336–352.  
641 <https://doi.org/10.1034/j.1600-0706.2000.910214.x>
- 642 Calderón-Sanou I, Münkemüller T, Zinger L, et al (2021) Cascading effects of moth outbreaks on  
643 subarctic soil food webs. *Sci Rep* 11:15054. <https://doi.org/10.1038/s41598-021-94227-z>
- 644 Cease AJ, Elser JJ, Ford CF, et al (2012) Heavy Livestock Grazing Promotes Locust Outbreaks by  
645 Lowering Plant Nitrogen Content. *Science* 335:467–469.  
646 <https://doi.org/10.1126/science.1214433>
- 647 Chu H, Grogan P (2010) Soil microbial biomass, nutrient availability and nitrogen mineralization  
648 potential among vegetation-types in a low arctic tundra landscape. *Plant Soil* 329:411–420.  
649 <https://doi.org/10.1007/s11104-009-0167-y>

- 650 Clauss M, Lechner-Doll M, Streich WJ (2003) Ruminant diversification as an adaptation to the  
651 physicommechanical characteristics of forage. A reevaluation of an old debate and a new  
652 hypothesis. *Oikos* 102:253–262
- 653 Denton CS, Bardgett RD, Cook R, Hobbs PJ (1998) Low amounts of root herbivory positively  
654 influence the rhizosphere microbial community in a temperate grassland soil. *Soil Biol  
655 Biochem* 31:155–165
- 656 Deraison H, Badenhausser I, Loeuille N, et al (2015) Functional trait diversity across trophic levels  
657 determines herbivore impact on plant community biomass. *Ecol Lett* 18:1346–1355
- 658 Dray S, Chessel D, Thioulouse J (2003) Co-inertia analysis and the linking of ecological data tables.  
659 *Ecology* 84:3078–3089
- 660 Dray S, Dufour A-B (2007) The ade4 package: implementing the duality diagram for ecologists. *J  
661 Stat Softw* 22:1–20
- 662 Farrell M, Hill PW, Farrar J, et al (2011) Seasonal variation in soluble soil carbon and nitrogen across  
663 a grassland productivity gradient. *Soil Biol Biochem* 43:835–844.  
664 <https://doi.org/10.1016/j.soilbio.2010.12.022>
- 665 Fielding DJ, Trainor E, Zhang M (2013) Diet influences rates of carbon and nitrogen mineralization  
666 from decomposing grasshopper frass and cadavers. *Biol Fertil Soils* 49:537–544
- 667 Findlay S, Carreiro M, Kruschik V, Jones CG (1996) Effects of damage to living plants on leaf litter  
668 quality. *Ecol Appl* 6:269–275
- 669 Frank DA, Groffman PM, Evans RD, Tracy BF (2000) Ungulate stimulation of nitrogen cycling and  
670 retention in Yellowstone Park grasslands. *Oecologia* 123:116–121
- 671 Garibaldi LA, Semmartin M, Chaneton EJ (2007) Grazing-induced changes in plant composition  
672 affect litter quality and nutrient cycling in flooding Pampa grasslands. *Oecologia* 151:650–662
- 673 Grigulis K, Lavorel S, Krainer U, et al (2013) Relative contributions of plant traits and soil microbial  
674 properties to mountain grassland ecosystem services. *J Ecol* 101:47–57.  
675 <https://doi.org/10.1111/1365-2745.12014>
- 676 Hamilton EW, Frank DA (2001) Can plants stimulate soil microbes and their own nutrient supply?  
677 Evidence from a grazing tolerant grass. *Ecology* 82:2397–2402
- 678 Hamilton EW, Frank DA, Hinchey PM, Murray TR (2008) Defoliation induces root exudation and  
679 triggers positive rhizospheric feedbacks in a temperate grassland. *Soil Biol Biochem*  
680 40:2865–2873
- 681 Harrison KA, Bardgett RD (2004) Browsing by red deer negatively impacts on soil nitrogen  
682 availability in regenerating native forest. *Soil Biol Biochem* 36:115–126.  
683 <https://doi.org/10.1016/j.soilbio.2003.08.022>
- 684 Hattenschwiler S, Vitousek PM (2000) The role of polyphenols in terrestrial ecosystem nutrient  
685 cycling. *Trends Ecol Evol* 15:238–243

- 686 Hofmann RR (1989) Evolutionary steps of ecophysiological adaptation and diversification of  
687 ruminants: a comparative view of their digestive system. *Oecologia* 78:443–457
- 688 Holland JN (1995) Effects of above-ground herbivory on soil microbial biomass in conventional and  
689 no-tillage agroecosystems. *Appl Soil Ecol* 2:275–279
- 690 Holland JN, Cheng W, Crossley D (1996) Herbivore-induced changes in plant carbon allocation:  
691 assessment of below-ground C fluxes using carbon-14. *Oecologia* 107:87–94
- 692 Hunter MD (2001) Insect population dynamics meets ecosystem ecology: effects of herbivory on soil  
693 nutrient dynamics. *Agric For Entomol* 3:77–84
- 694 Hunter MD, Reynolds BC, Hall MC, Frost CJ (2012) Effects of herbivores on terrestrial ecosystem  
695 processes: the role of trait-mediated indirect effects. In: *Trait-mediated indirect interactions:  
696 ecological and evolutionary perspectives*. Takayuki Ohgushi, Oswald Schmitz, Robert D. Holt,  
697 Cambridge University Press, pp 339–370
- 698 Ibanez S, Brun C, Millery A, et al (2021) Litter and soil characteristics mediate the buffering effect of  
699 snow cover on litter decomposition. *Plant Soil*. <https://doi.org/10.1007/s11104-020-04803-x>
- 700 Ibanez S, Lavorel S, Puijalon S, Moretti M (2013) Herbivory mediated by coupling between  
701 biomechanical traits of plants and grasshoppers. *Funct Ecol* 27:479–489.  
702 <https://doi.org/10.1111/1365-2435.12058>
- 703 Jenkinson DS, Brookes PC, Powlson DS (2004) Measuring soil microbial biomass. *Soil Biol Biochem*  
704 36:5–7. <https://doi.org/10.1016/j.soilbio.2003.10.002>
- 705 Jones DL, Willett VB (2006) Experimental evaluation of methods to quantify dissolved organic  
706 nitrogen (DON) and dissolved organic carbon (DOC) in soil. *Soil Biol Biochem* 38:991–999
- 707 Kristensen JÅ, Rousk J, Metcalfe DB (2020) Below-ground responses to insect herbivory in  
708 ecosystems with woody plant canopies: A meta-analysis. *J Ecol* 108:917–930
- 709 Kuznetsova A, Brockhoff PB, Christensen RHB (2017) lmerTest Package: Tests in Linear Mixed  
710 Effects Models. *J Stat Softw* 82:1–26. <https://doi.org/10.18637/jss.v082.i13>
- 711 Lavorel S, Grigulis K, McIntyre S, et al (2008) Assessing functional diversity in the field –  
712 methodology matters! *Funct Ecol* 22:134–147. [https://doi.org/10.1111/j.1365-  
713 2435.2007.01339.x](https://doi.org/10.1111/j.1365-2435.2007.01339.x)
- 714 Levy EG, Madden EA (1933) The point method of vegetation analysis. *N Z J Agric* 46:267–279
- 715 Lovett GM, Ruesink AE (1995) Carbon and nitrogen mineralization from decomposing gypsy moth  
716 frass. *Oecologia* 104:133–138. <https://doi.org/10.1007/BF00328577>
- 717 Malik AA, Martiny JBH, Brodie EL, et al (2020) Defining trait-based microbial strategies with  
718 consequences for soil carbon cycling under climate change. *ISME J* 14:1–9.  
719 <https://doi.org/10.1038/s41396-019-0510-0>
- 720 Malik AA, Puissant J, Goodall T, et al (2019) Soil microbial communities with greater investment in  
721 resource acquisition have lower growth yield. *Soil Biol Biochem* 132:36–39.  
722 <https://doi.org/10.1016/j.soilbio.2019.01.025>



- 723 McNaughton SJ (1983) Compensatory plant growth as a response to herbivory. *Oikos* 329–336
- 724 McNaughton SJ, Banyikwa FF, McNaughton MM (1997) Promotion of the cycling of diet-enhancing  
725 nutrients by African grazers. *Science* 278:1798–1800
- 726 McNaughton SJ, Ruess RW, Seagle SW (1988) Large Mammals and Process Dynamics in African  
727 Ecosystems. *BioScience* 38:794–800. <https://doi.org/10.2307/1310789>
- 728 Nitschke N, Wiesner K, Hilke I, et al (2014) Increase of fast nutrient cycling in grassland microcosms  
729 through insect herbivory depends on plant functional composition and species diversity.  
730 *Oikos*
- 731 Parker TC, Sadowsky J, Dunleavy H, et al (2017) Slowed biogeochemical cycling in sub-arctic birch  
732 forest linked to reduced mycorrhizal growth and community change after a defoliation event.  
733 *Ecosystems* 20:316–330
- 734 Pastor J, Dewey B, Naiman RJ, et al (1993) Moose browsing and soil fertility in the boreal forests of  
735 Isle Royale National Park. *Ecology* 74:467–480
- 736 Paterson E, Thornton B, Sim A, Pratt S (2003) Effects of defoliation and atmospheric CO<sub>2</sub> depletion  
737 on nitrate acquisition, and exudation of organic compounds by roots of *Festuca rubra*. *Plant*  
738 *Soil* 250:293–305
- 739 Piton G, Foulquier A, Martínez-García LB, et al (2020a) Disentangling drivers of soil microbial  
740 potential enzyme activity across rain regimes: An approach based on the functional trait  
741 framework. *Soil Biol Biochem* 148:107881. <https://doi.org/10.1016/j.soilbio.2020.107881>
- 742 Piton G, Legay N, Arnoldi C, et al (2020b) Using proxies of microbial community-weighted means  
743 traits to explain the cascading effect of management intensity, soil and plant traits on  
744 ecosystem resilience in mountain grasslands. *J Ecol* 108:876–893.  
745 <https://doi.org/10.1111/1365-2745.13327>
- 746 Potthast K, Meyer S, Tischer A, et al (2021) Grasshopper herbivory immediately affects element  
747 cycling but not export rates in an N-limited grassland system. *Ecosphere* 12:e03449.  
748 <https://doi.org/10.1002/ecs2.3449>
- 749 R Core Team (2019) R: A language and environment for statistical computing. R Foundation for  
750 Statistical Computing, Vienna, Austria
- 751 Reich PB (2014) The world-wide ‘fast–slow’ plant economics spectrum: a traits manifesto. *J Ecol*  
752 102:275–301
- 753 Rhoades DF (1985) Offensive-defensive interactions between herbivores and plants: their relevance  
754 in herbivore population dynamics and ecological theory. *Am Nat* 125:205–238
- 755 Ritchie ME, Tilman D, Knops JMH (1998) Herbivore effects on plant and nitrogen dynamics in oak  
756 savanna. 79:13
- 757 Sandén H, Mayer M, Stark S, et al (2020) Moth outbreaks reduce decomposition in subarctic forest  
758 soils. *Ecosystems* 23:151–163

- 759 Sankaran M, Augustine DJ (2004) Large herbivores suppress decomposer abundance in a semiarid  
760 grazing ecosystem. *Ecology* 85:1052–1061
- 761 Satterthwaite FE (1946) An approximate distribution of estimates of variance components. *Biom Bull*  
762 2:110–114
- 763 Schimel JP, Bennett J (2004) Nitrogen mineralization: challenges of a changing paradigm. *Ecology*  
764 85:591–602
- 765 Schmitz OJ (2008) Effects of predator hunting mode on grassland ecosystem function. *Science*  
766 319:952–954
- 767 Schultz JC, Baldwin IT (1982) Oak Leaf Quality Declines in Response to Defoliation by Gypsy Moth  
768 Larvae. *Science* 217:149–151. <https://doi.org/10.1126/science.217.4555.149>
- 769 Singer FJ, Schoenecker KA (2003) Do ungulates accelerate or decelerate nitrogen cycling? *For Ecol*  
770 *Manag* 181:189–204
- 771 Sinsabaugh RL, Hill BH, Follstad Shah JJ (2009) Ecoenzymatic stoichiometry of microbial organic  
772 nutrient acquisition in soil and sediment. *Nature* 462:795–798.  
773 <https://doi.org/10.1038/nature08632>
- 774 Stark S, Grellmann D (2002) Soil microbial responses to herbivory in an arctic tundra heath at two  
775 levels of nutrient availability. *Ecology* 83:2736–2744
- 776 Talal S, Cease AJ, Youngblood JP, et al (2020) Plant carbohydrate content limits performance and  
777 lipid accumulation of an outbreaking herbivore. *Proc R Soc B* 287:20202500
- 778 Tilman D (1988) *Plant strategies and the dynamics and structure of plant communities* Princeton, N J  
779 Princet Univ Press 26–28
- 780 Tuomi M, Stark S, Hoset KS, et al (2019) Herbivore Effects on Ecosystem Process Rates in a Low-  
781 Productive System. *Ecosystems* 22:827–843. <https://doi.org/10.1007/s10021-018-0307-4>
- 782 Van Der Wal R, Bardgett RD, Harrison KA, Stien A (2004) Vertebrate herbivores and ecosystem  
783 control: cascading effects of faeces on tundra ecosystems. *Ecography* 27:242–252
- 784 Van Kessel C, Clough T, van Groenigen JW (2009) Dissolved organic nitrogen: an overlooked  
785 pathway of nitrogen loss from agricultural systems? *J Environ Qual* 38:393–401
- 786 van Wijnen HJ, van der Wal R, Bakker JP (1999) The impact of herbivores on nitrogen mineralization  
787 rate: consequences for salt-marsh succession. *Oecologia* 118:225–231
- 788 Vance ED, Brookes PC, Jenkinson DS (1987) An extraction method for measuring soil microbial  
789 biomass C. *Soil Biol Biochem* 19:703–707
- 790 Vittoz P, Guisan A (2007) How reliable is the monitoring of permanent vegetation plots? A test with  
791 multiple observers. *J Veg Sci* 18:413–422
- 792 Wardle D A, Bardgett Richard D, Klironomos John N, et al (2004) Ecological Linkages Between  
793 Aboveground and Belowground Biota. *Sci Wash DC* 304:1629–1633

794 Wienhold BJ (2007) Comparison of laboratory methods and an in situ method for estimating nitrogen  
795 mineralization in an irrigated silt-loam soil. *Commun Soil Sci Plant Anal* 38:1721–1732

796 Williams A, Langridge H, Straathof AL, et al (2022) Root functional traits explain root exudation rate  
797 and composition across a range of grassland species. *J Ecol* 110:21–33

798 Wood JL, Tang C, Franks AE (2018) Competitive traits are more important than stress-tolerance  
799 traits in a cadmium-contaminated rhizosphere: a role for trait theory in microbial ecology.  
800 *Front Microbiol* 9:121

801

802

803

804

## Supplementary Figures & Tables

### 805 Sup. Fig. 1

806 Mean percentage of leaf area eaten for each plant functional group, in function of (A) grasshopper  
807 treatment, and (B) grassland type. The percentage of leaf area eaten was estimated from  
808 observations (mid July 2017) of the dominant plant species in each plot.  
809

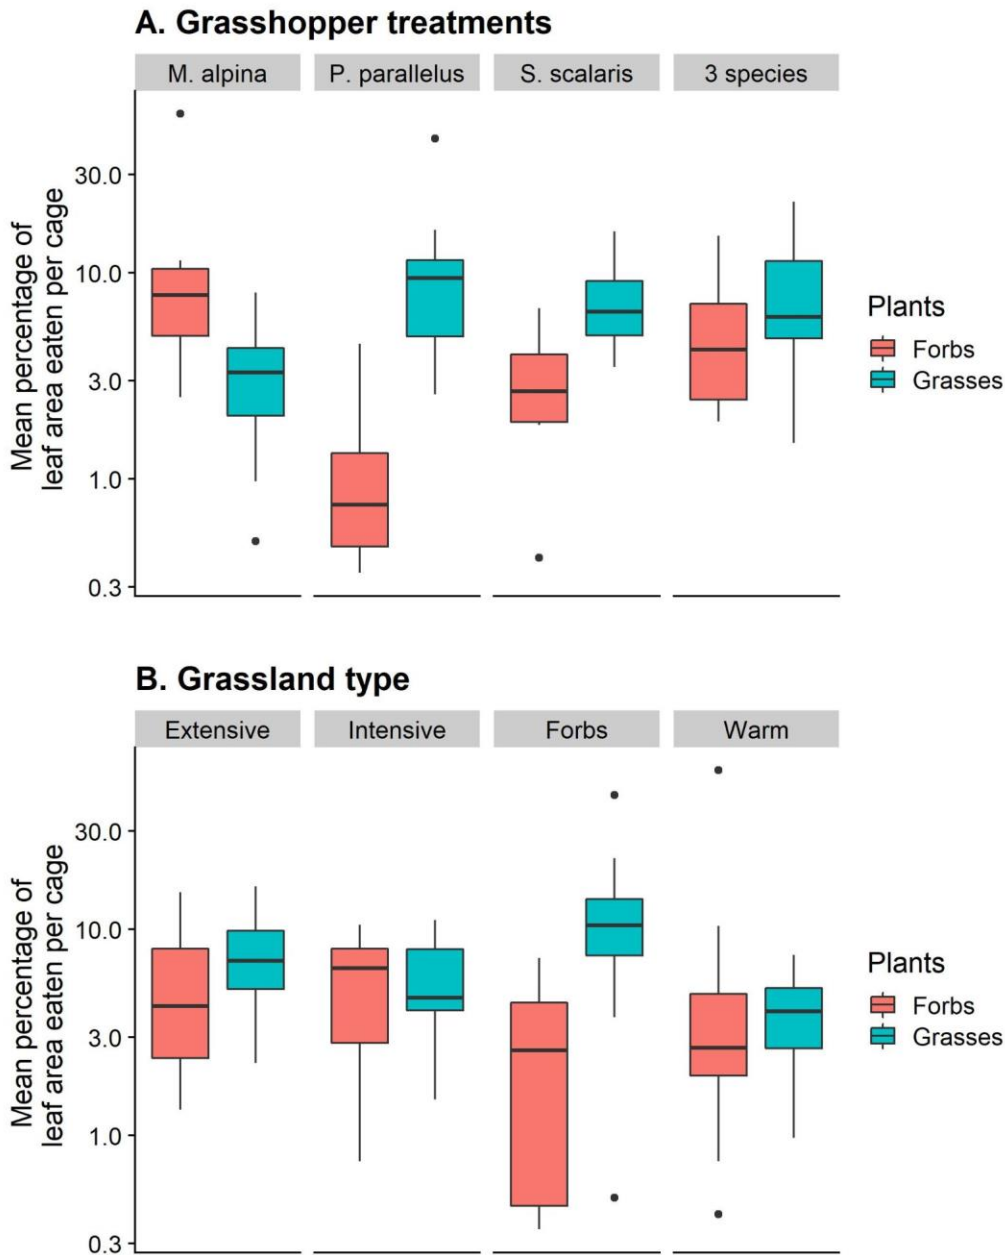

810

811

## Sup. Fig. 2

812 Leaf C/N ratio of forbs and grasses in the four grassland types.

813

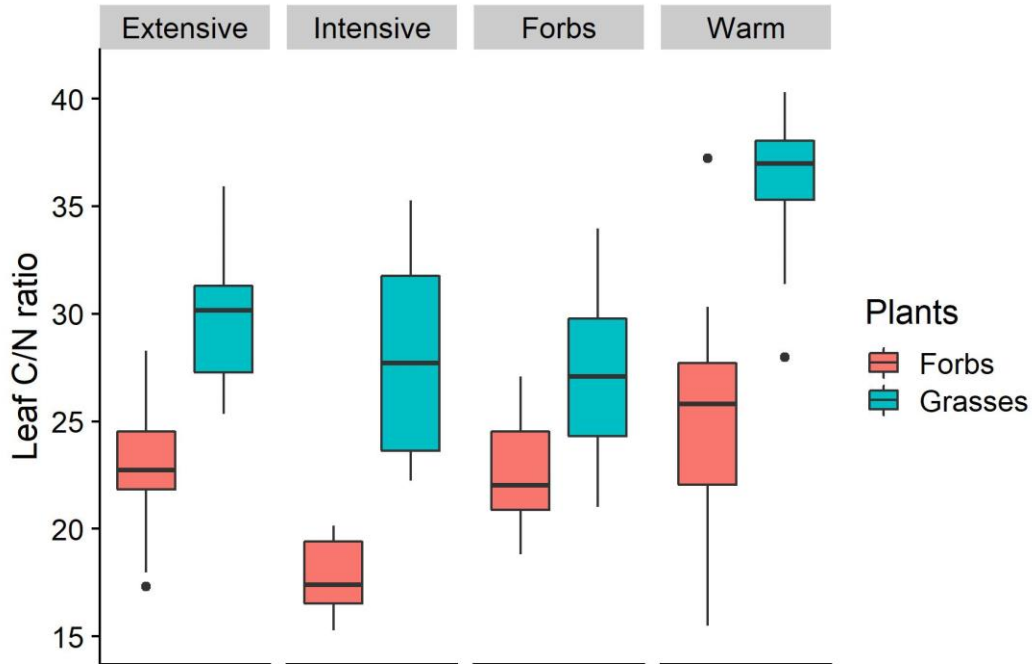

814

815

816

## Sup. Fig. 3

817

Variation of the percentage of forbs estimated by the point quadrat method after one year of

818

herbivory, in function of the herbivory treatment.

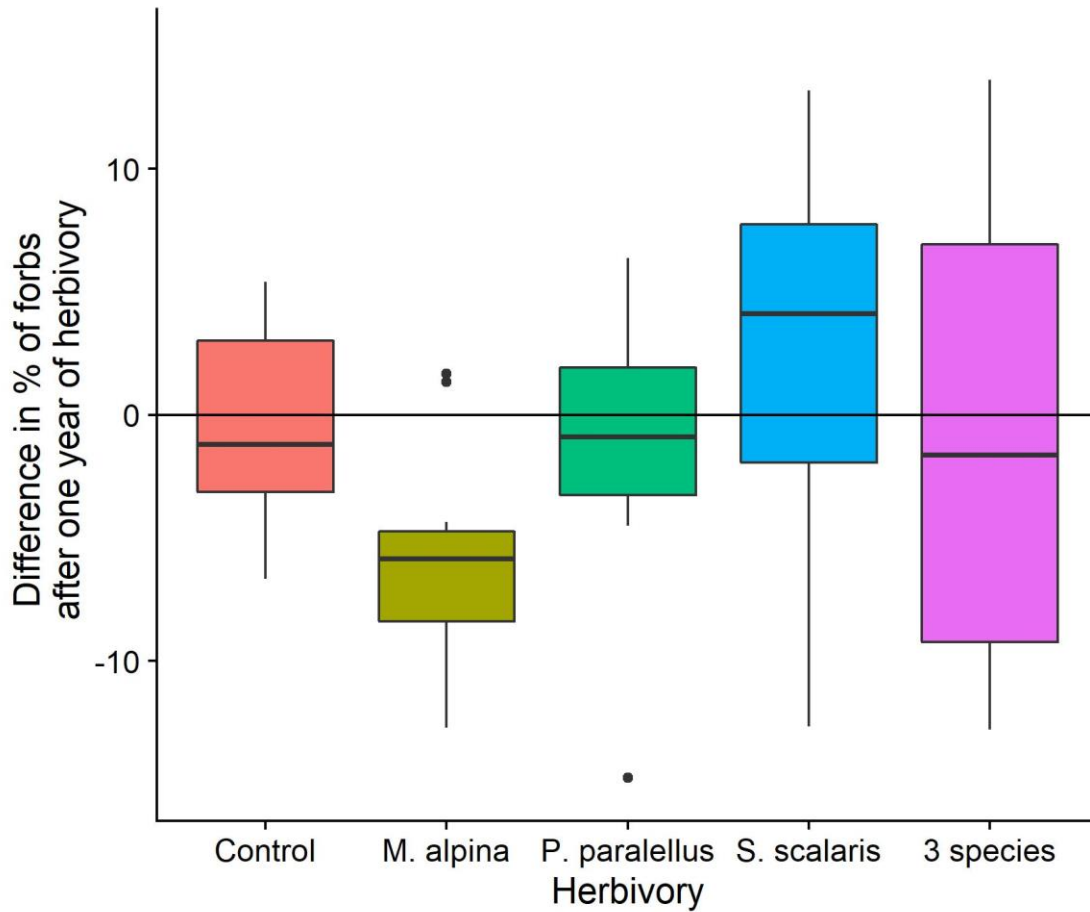

819

820

821 **Sup. Tab. 1**

822 Mean±sd of each of the 12 sites (with 5 plots per site). SWC: Soil water content (%), SOM: Soil  
 823 organic matter (%), TDN: Total dissolved nitrogen (µg/g), PNM: Potential nitrogen mineralization  
 824 (µgN/g dry soil/day), MBN: Microbial biomass nitrogen (µg/g), EEN: Nitrogen-related enzymes (nmol  
 825 activity/ g dry soil/h), EEC: Carbon-related enzymes, EEP: Phosphorous-related enzymes, Biomass:  
 826 Plant biomass (g/m<sup>2</sup>), N\_B: Nitrogen in aboveground plant biomass (g/m<sup>2</sup>), Forbs: Forb biomass  
 827 (g/m<sup>2</sup>). Geographical coordinates are also given.  
 828

|          | Extensive prairies |             |             | Intensive prairies |             |             | Forb-dominated grasslands |             |             | Warm grasslands |             |             |
|----------|--------------------|-------------|-------------|--------------------|-------------|-------------|---------------------------|-------------|-------------|-----------------|-------------|-------------|
|          | EX1                | EX2         | EX3         | IN1                | IN2         | IN3         | MG1                       | MG2         | MG3         | BR1             | BR2         | BR3         |
| SWC      | 24.6 ± 2.3         | 27.3 ± 2.5  | 24.1 ± 1.6  | 21.2 ± 2.2         | 19.9 ± 3.4  | 33.7 ± 1.8  | 30.5 ± 0.6                | 29.1 ± 1.3  | 35.6 ± 1.2  | 45.9 ± 2.3      | 27.3 ± 2.2  | 26.6 ± 4.9  |
| SOM      | 9.09 ± 1.11        | 9.55 ± 0.58 | 8.07 ± 0.39 | 8.45 ± 0.63        | 6.35 ± 0.61 | 12.7 ± 0.6  | 10.8 ± 0.9                | 9.53 ± 0.57 | 15.4 ± 1.3  | 32.6 ± 4        | 15.9 ± 1.8  | 14.8 ± 2    |
| pH       | 5.21 ± 0.33        | 5.14 ± 0.1  | 5.04 ± 0.04 | 6.24 ± 0.31        | 4.98 ± 0.03 | 7.07 ± 0.1  | 4.15 ± 0.07               | 7.83 ± 0.1  | 6.45 ± 0.64 | 6.51 ± 0.16     | 7.69 ± 0.29 | 7.89 ± 0.09 |
| TDN      | 31.6 ± 3.5         | 44.8 ± 3.5  | 42.2 ± 2.7  | 19 ± 1.1           | 48.5 ± 8.2  | 38.3 ± 3.2  | 36.5 ± 3                  | 26 ± 1.9    | 46.5 ± 18.6 | 98.3 ± 23.1     | 46.3 ± 8    | 43.3 ± 8.5  |
| Soil C/N | 18.2 ± 2.3         | 18.2 ± 1.3  | 18.2 ± 2    | 23 ± 6.4           | 21.5 ± 5.6  | 15.4 ± 1.3  | 25 ± 10                   | 23.3 ± 3.1  | 19 ± 3.4    | 16.7 ± 3.8      | 30.5 ± 13.3 | 27 ± 9.8    |
| PNM      | 8.84 ± 5.41        | 9.76 ± 2.24 | 11.4 ± 4.9  | 9 ± 2.27           | 8.16 ± 1.51 | 8.14 ± 3.68 | 6.43 ± 1.45               | 4.72 ± 1.4  | 10.1 ± 1.6  | 28.2 ± 8.8      | 15 ± 3.8    | 16.6 ± 4.9  |
| MBN      | 42.8 ± 5.6         | 47.7 ± 5    | 39.9 ± 4    | 49.8 ± 2.6         | 28.8 ± 6.9  | 68.3 ± 3.9  | 41.6 ± 18.8               | 54.8 ± 3.8  | 60.3 ± 4.7  | 43.9 ± 22.7     | 29.7 ± 14.7 | 50.2 ± 9.5  |
| EEN      | 673 ± 68           | 466 ± 48    | 337 ± 65    | 451 ± 147          | 336 ± 50    | 728 ± 382   | 228 ± 44                  | 1356 ± 136  | 637 ± 100   | 1155 ± 132      | 1155 ± 459  | 1429 ± 254  |
| EEC/EEN  | 447 ± 52           | 351 ± 88    | 262 ± 79    | 511 ± 196          | 352 ± 98    | 742 ± 333   | 279 ± 78                  | 483 ± 92    | 390 ± 130   | 1038 ± 705      | 593 ± 369   | 481 ± 128   |
| EEP      | 1165 ± 229         | 1248 ± 236  | 1131 ± 190  | 838 ± 254          | 742 ± 125   | 480 ± 116   | 1505 ± 167                | 105 ± 40    | 651 ± 186   | 1827 ± 210      | 164 ± 127   | 135 ± 32    |
| EEC/EEN  | 0.67 ± 0.1         | 0.75 ± 0.17 | 0.77 ± 0.1  | 1.12 ± 0.08        | 1.03 ± 0.17 | 1.04 ± 0.14 | 1.25 ± 0.34               | 0.35 ± 0.04 | 0.6 ± 0.12  | 0.86 ± 0.47     | 0.7 ± 0.81  | 0.34 ± 0.06 |
| Biomass  | 388 ± 66           | 464 ± 26    | 465 ± 84    | 491 ± 89           | 645 ± 129   | 702 ± 110   | 440 ± 31                  | 225 ± 47    | 412 ± 48    | 351 ± 98        | 391 ± 82    | 274 ± 55    |
| Leaf C/N | 28.1 ± 2.4         | 27.3 ± 2.4  | 28.7 ± 3.4  | 23.1 ± 2.2         | 27.8 ± 5.2  | 31.3 ± 2.3  | 23.8 ± 1.8                | 25.8 ± 1.9  | 20.5 ± 1.1  | 32.9 ± 3.8      | 34.4 ± 2.2  | 40.6 ± 3.8  |
| N_B      | 7.35 ± 1.31        | 9.33 ± 0.74 | 8.5 ± 1.88  | 11.4 ± 2.6         | 12 ± 2.2    | 11.3 ± 2    | 9.78 ± 0.92               | 4.19 ± 1.03 | 9.94 ± 1.58 | 6.2 ± 2.44      | 6.34 ± 1.97 | 3.47 ± 0.62 |
| Shannon  | 1.8 ± 0.16         | 1.69 ± 0.19 | 1.66 ± 0.2  | 2.37 ± 0.09        | 1.46 ± 0.2  | 1.98 ± 0.13 | 1.96 ± 0.21               | 2.28 ± 0.27 | 2.68 ± 0.03 | 2.07 ± 0.53     | 1.63 ± 0.2  | 0.91 ± 0.41 |
| Forbs    | 161 ± 44           | 167 ± 58    | 126 ± 51    | 123 ± 70           | 36.8 ± 37.6 | 4.69 ± 3.31 | 369 ± 47                  | 203 ± 47    | 376 ± 47    | 64.5 ± 47.9     | 118 ± 42    | 37.7 ± 33.3 |
| Lat      | 45.1589114         | 45.1665751  | 45.1590965  | 45.1509678         | 45.15276    | 45.1630496  | 45.2170777                | 45.1687254  | 45.2172083  | 45.2185605      | 45.1690667  | 45.1693922  |
| Long     | 5.52397504         | 5.53694229  | 5.53318494  | 5.55091331         | 5.52717685  | 5.52653451  | 5.55924632                | 5.56912743  | 5.55883236  | 5.56011453      | 5.56860468  | 5.56848548  |

829  
830
